# Supplementary material for: Oral Health-Related Knowledge, Attitudes and Behaviours of Arab Dental Students: Multi-National Cross-Sectional Study and Literature Analysis 2000–2020
Source: MDPI journal article supplement (doi:10.3390/ijerph19031658), 2022-01-31
Supplement: s1 [file s1]

**Table S1.** Responses of the Participating Students to the Individual HU-DBI Items Stratified by Academic Year, 2019/2020, ( $n = 1430$ )

| Variable    | Outcome  | 1 <sup>st</sup> Year<br>( $n = 281$ ) | 2 <sup>nd</sup> Year<br>( $n = 307$ ) | 3 <sup>rd</sup> Year<br>( $n = 239$ ) | 4 <sup>th</sup> Year<br>( $n = 261$ ) | 5 <sup>th</sup> Year<br>( $n = 250$ ) | 6 <sup>th</sup> Year<br>( $n = 92$ ) | Sig.              |
|-------------|----------|---------------------------------------|---------------------------------------|---------------------------------------|---------------------------------------|---------------------------------------|--------------------------------------|-------------------|
| Item No. 1  | Agree    | 216 (76.9%)                           | 242 (78.8%)                           | 196 (82%)                             | 208 (79.7%)                           | 192 (76.8%)                           | 57 (62%)                             | <b>0.005</b>      |
| Item No. 2  | Disagree | 174 (61.9%)                           | 197 (64.2%)                           | 152 (63.6%)                           | 190 (72.8%)                           | 191 (76.4%)                           | 67 (72.8%)                           | <b>0.001</b>      |
| Item No. 3  | Agree    | 264 (94%)                             | 287 (93.5%)                           | 227 (95%)                             | 255 (97.7%)                           | 231 (92.4%)                           | 88 (95.7%)                           | 0.134             |
| Item No. 4  | Agree    | 92 (32.7%)                            | 101 (32.9%)                           | 90 (37.7%)                            | 94 (36%)                              | 77 (30.8%)                            | 39 (42.4%)                           | 0.296             |
| Item No. 5  | Agree    | 71 (25.3%)                            | 85 (27.7%)                            | 54 (22.6%)                            | 88 (33.7%)                            | 78 (31.2%)                            | 35 (38%)                             | <b>0.016</b>      |
| Item No. 6  | Disagree | 184 (65.5%)                           | 205 (66.4%)                           | 133 (55.6%)                           | 173 (66.3%)                           | 162 (64.8%)                           | 66 (71.7%)                           | <b>0.046</b>      |
| Item No. 7  | Agree    | 42 (14.9%)                            | 25 (8.1%)                             | 22 (9.2%)                             | 28 (10.7%)                            | 26 (10.4%)                            | 15 (16.3%)                           | 0.062             |
| Item No. 8  | Disagree | 183 (65.1%)                           | 215 (70%)                             | 178 (74.5%)                           | 201 (77%)                             | 203 (81.2%)                           | 79 (85.9%)                           | <b>&lt; 0.001</b> |
| Item No. 9  | Agree    | 170 (60.5%)                           | 200 (65.1%)                           | 167 (69.9%)                           | 181 (69.3%)                           | 193 (77.2%)                           | 51 (55.4%)                           | <b>&lt; 0.001</b> |
| Item No. 10 | Disagree | 155 (55.2%)                           | 207 (67.4%)                           | 159 (66.5%)                           | 195 (74.7%)                           | 193 (77.2%)                           | 78 (84.8%)                           | <b>&lt; 0.001</b> |
| Item No. 11 | Agree    | 39 (13.9%)                            | 48 (15.6%)                            | 41 (17.2%)                            | 60 (23%)                              | 61 (24.4%)                            | 43 (46.7%)                           | <b>&lt; 0.001</b> |
| Item No. 12 | Agree    | 253 (90%)                             | 283 (92.2%)                           | 221 (92.5%)                           | 239 (91.6%)                           | 226 (90.4%)                           | 87 (94.6%)                           | 0.737             |
| Item No. 13 | Agree    | 253 (90%)                             | 285 (92.8%)                           | 219 (91.6%)                           | 234 (89.7%)                           | 230 (92%)                             | 83 (90.2%)                           | 0.756             |
| Item No. 14 | Disagree | 98 (34.9%)                            | 96 (31.3%)                            | 86 (36%)                              | 103 (39.5%)                           | 110 (44%)                             | 43 (46.7%)                           | <b>0.013</b>      |
| Item No. 15 | Disagree | 128 (45.6%)                           | 152 (49.5%)                           | 117 (49%)                             | 144 (55.2%)                           | 140 (56%)                             | 41 (44.6%)                           | 0.084             |
| Item No. 16 | Agree    | 19 (6.8%)                             | 23 (7.5%)                             | 20 (8.4%)                             | 35 (13.4%)                            | 36 (14.4%)                            | 4 (4.3%)                             | <b>0.002</b>      |
| Item No. 17 | Agree    | 87 (31%)                              | 61 (19.9%)                            | 57 (23.8%)                            | 34 (13%)                              | 36 (14.4%)                            | 12 (13%)                             | <b>&lt; 0.001</b> |
| Item No. 18 | Agree    | 117 (41.6%)                           | 118 (38.4%)                           | 103 (43.1%)                           | 73 (28%)                              | 64 (25.6%)                            | 17 (18.5%)                           | <b>&lt; 0.001</b> |
| Item No. 19 | Agree    | 121 (43.1%)                           | 124 (40.4%)                           | 109 (45.6%)                           | 131 (50.2%)                           | 116 (46.4%)                           | 38 (41.3%)                           | 0.252             |
| Item No. 20 | Agree    | 146 (52%)                             | 167 (54.4%)                           | 155 (64.9%)                           | 169 (64.8%)                           | 165 (66%)                             | 64 (69.6%)                           | <b>&lt; 0.001</b> |

Chi-squared ( $\chi^2$ ) test was used with a significance level ( $Sig.$ )  $\leq 0.05$ . The significant values are in **bold** font.

**Table S2.** Lebanese Students' Responses to the Individual HU-DBI Items Stratified by Gender and Clinical Training, 2019/2020, ( $n = 316$ )

| Variable    | Outcome  | Female<br>( $n = 210$ ) | Male<br>( $n = 106$ ) | Sig.  | Preclinical<br>( $n = 209$ ) | Clinical<br>( $n = 107$ ) | Sig.              |
|-------------|----------|-------------------------|-----------------------|-------|------------------------------|---------------------------|-------------------|
| Item No. 1  | Agree    | 166 (79%)               | 82 (77.4%)            | 0.730 | 161 (77%)                    | 87 (81.3%)                | 0.382             |
| Item No. 2  | Disagree | 167 (79.5%)             | 84 (79.2%)            | 0.954 | 156 (74.6%)                  | 95 (88.8%)                | <b>0.003</b>      |
| Item No. 3  | Agree    | 199 (94.8%)             | 98 (92.5%)            | 0.415 | 195 (93.3%)                  | 102 (95.3%)               | 0.473             |
| Item No. 4  | Agree    | 57 (27.1%)              | 32 (30.2%)            | 0.570 | 69 (33%)                     | 20 (18.7%)                | <b>0.007</b>      |
| Item No. 5  | Agree    | 41 (19.5%)              | 19 (17.9%)            | 0.732 | 33 (15.8%)                   | 27 (25.2%)                | <b>0.043</b>      |
| Item No. 6  | Disagree | 130 (61.9%)             | 76 (71.7%)            | 0.084 | 135 (64.6%)                  | 71 (66.4%)                | 0.756             |
| Item No. 7  | Agree    | 11 (5.2%)               | 5 (4.7%)              | 0.842 | 12 (5.7%)                    | 4 (3.7%)                  | 0.442             |
| Item No. 8  | Disagree | 159 (75.7%)             | 88 (83%)              | 0.138 | 156 (74.6%)                  | 91 (85%)                  | <b>0.034</b>      |
| Item No. 9  | Agree    | 157 (74.8%)             | 85 (80.2%)            | 0.282 | 149 (71.3%)                  | 93 (86.9%)                | <b>0.002</b>      |
| Item No. 10 | Disagree | 152 (72.4%)             | 84 (79.2%)            | 0.185 | 143 (68.4%)                  | 93 (86.9%)                | <b>&lt; 0.001</b> |
| Item No. 11 | Agree    | 34 (16.2%)              | 19 (17.9%)            | 0.697 | 27 (12.9%)                   | 26 (24.3%)                | <b>0.010</b>      |
| Item No. 12 | Agree    | 193 (91.9%)             | 95 (89.6%)            | 0.500 | 190 (90.9%)                  | 98 (91.6%)                | 0.841             |
| Item No. 13 | Agree    | 192 (91.4%)             | 99 (93.4%)            | 0.541 | 193 (92.3%)                  | 98 (91.6%)                | 0.814             |
| Item No. 14 | Disagree | 77 (36.7%)              | 46 (43.4%)            | 0.247 | 80 (38.3%)                   | 43 (40.2%)                | 0.742             |
| Item No. 15 | Disagree | 134 (63.8%)             | 65 (61.3%)            | 0.665 | 126 (60.3%)                  | 73 (68.2%)                | 0.167             |
| Item No. 16 | Agree    | 35 (16.7%)              | 17 (16%)              | 0.887 | 14 (6.7%)                    | 38 (35.5%)                | <b>&lt; 0.001</b> |
| Item No. 17 | Agree    | 39 (18.6%)              | 22 (20.8%)            | 0.642 | 52 (24.9%)                   | 9 (8.4%)                  | <b>&lt; 0.001</b> |

|             |       |            |            |       |             |            |              |
|-------------|-------|------------|------------|-------|-------------|------------|--------------|
| Item No. 18 | Agree | 57 (27.1%) | 30 (28.3%) | 0.828 | 69 (33%)    | 18 (16.8%) | <b>0.002</b> |
| Item No. 19 | Agree | 84 (40%)   | 38 (35.8%) | 0.474 | 78 (37.3%)  | 44 (41.1%) | 0.511        |
| Item No. 20 | Agree | 126 (60%)  | 75 (70.8%) | 0.061 | 121 (57.9%) | 80 (74.8%) | <b>0.003</b> |

Chi-squared ( $\chi^2$ ) test was used with a significance level ( $Sig.$ )  $\leq 0.05$ . The significant values are in **bold** font.

**Table S3.** Syrian Students' Responses to the Individual HU-DBI Items Stratified by Gender and Clinical Training, 2019/2020, ( $n = 561$ )

| Variable    | Outcome  | Female<br>( $n = 239$ ) | Male<br>( $n = 322$ ) | $Sig.$            | Preclinical<br>( $n = 333$ ) | Clinical<br>( $n = 228$ ) | $Sig.$            |
|-------------|----------|-------------------------|-----------------------|-------------------|------------------------------|---------------------------|-------------------|
| Item No. 1  | Agree    | 170 (71.1%)             | 278 (86.3%)           | <b>&lt; 0.001</b> | 269 (80.8%)                  | 179 (78.5%)               | 0.510             |
| Item No. 2  | Disagree | 160 (66.9%)             | 216 (67.1%)           | 0.973             | 204 (61.3%)                  | 172 (75.4%)               | <b>&lt; 0.001</b> |
| Item No. 3  | Agree    | 227 (95%)               | 300 (93.2%)           | 0.374             | 311 (93.4%)                  | 216 (94.7%)               | 0.512             |
| Item No. 4  | Agree    | 62 (25.9%)              | 141 (43.8%)           | <b>&lt; 0.001</b> | 119 (35.7%)                  | 84 (36.8%)                | 0.789             |
| Item No. 5  | Agree    | 88 (36.8%)              | 82 (25.5%)            | <b>0.004</b>      | 99 (29.7%)                   | 71 (31.1%)                | 0.721             |
| Item No. 6  | Disagree | 159 (66.5%)             | 189 (58.7%)           | 0.059             | 211 (63.4%)                  | 137 (60.1%)               | 0.432             |
| Item No. 7  | Agree    | 21 (8.8%)               | 51 (15.8%)            | <b>0.014</b>      | 43 (12.9%)                   | 29 (12.7%)                | 0.946             |
| Item No. 8  | Disagree | 172 (72%)               | 237 (73.6%)           | 0.666             | 235 (70.6%)                  | 174 (76.3%)               | 0.133             |
| Item No. 9  | Agree    | 183 (76.6%)             | 237 (73.6%)           | 0.423             | 238 (71.5%)                  | 182 (79.8%)               | <b>0.025</b>      |
| Item No. 10 | Disagree | 139 (58.2%)             | 195 (60.6%)           | 0.567             | 187 (56.2%)                  | 147 (64.5%)               | <b>0.049</b>      |
| Item No. 11 | Agree    | 40 (16.7%)              | 66 (20.5%)            | 0.261             | 67 (20.1%)                   | 39 (17.1%)                | 0.382             |
| Item No. 12 | Agree    | 216 (90.4%)             | 279 (86.6%)           | 0.175             | 294 (88.3%)                  | 201 (88.2%)               | 0.962             |
| Item No. 13 | Agree    | 210 (87.9%)             | 291 (90.4%)           | 0.342             | 294 (88.3%)                  | 207 (90.8%)               | 0.346             |
| Item No. 14 | Disagree | 87 (36.4%)              | 128 (39.8%)           | 0.420             | 124 (37.2%)                  | 91 (39.9%)                | 0.522             |
| Item No. 15 | Disagree | 119 (49.8%)             | 180 (55.9%)           | 0.151             | 171 (51.4%)                  | 128 (56.1%)               | 0.264             |
| Item No. 16 | Agree    | 25 (10.5%)              | 40 (12.4%)            | 0.473             | 36 (10.8%)                   | 29 (12.7%)                | 0.488             |
| Item No. 17 | Agree    | 46 (19.2%)              | 75 (23.3%)            | 0.249             | 84 (25.2%)                   | 37 (16.2%)                | <b>0.011</b>      |
| Item No. 18 | Agree    | 107 (44.8%)             | 141 (43.8%)           | 0.817             | 168 (50.5%)                  | 80 (35.1%)                | <b>&lt; 0.001</b> |
| Item No. 19 | Agree    | 137 (57.3%)             | 170 (52.8%)           | 0.287             | 168 (50.5%)                  | 139 (61%)                 | <b>0.014</b>      |
| Item No. 20 | Agree    | 159 (66.5%)             | 216 (67.1%)           | 0.890             | 215 (64.6%)                  | 160 (70.2%)               | 0.166             |

Chi-squared ( $\chi^2$ ) test was used with a significance level ( $Sig.$ )  $\leq 0.05$ . The significant values are in **bold** font.

**Table S4.** Tunisian Students' Responses to the Individual HU-DBI Items Stratified by Gender and Clinical Training, 2019/2020, ( $n = 553$ )

| Variable    | Outcome  | Female<br>( $n = 420$ ) | Male<br>( $n = 133$ ) | $Sig.$       | Preclinical<br>( $n = 285$ ) | Clinical<br>( $n = 268$ ) | $Sig.$            |
|-------------|----------|-------------------------|-----------------------|--------------|------------------------------|---------------------------|-------------------|
| Item No. 1  | Agree    | 308 (73.3%)             | 107 (80.5%)           | 0.098        | 224 (78.6%)                  | 191 (71.3%)               | <b>0.047</b>      |
| Item No. 2  | Disagree | 260 (61.9%)             | 84 (63.2%)            | 0.795        | 163 (57.2%)                  | 181 (67.5%)               | <b>0.012</b>      |
| Item No. 3  | Agree    | 404 (96.2%)             | 124 (93.2%)           | 0.153        | 272 (95.4%)                  | 256 (95.5%)               | 0.962             |
| Item No. 4  | Agree    | 142 (33.8%)             | 59 (44.4%)            | <b>0.027</b> | 95 (33.3%)                   | 106 (39.6%)               | 0.129             |
| Item No. 5  | Agree    | 140 (33.3%)             | 41 (30.8%)            | 0.591        | 78 (27.4%)                   | 103 (38.4%)               | <b>0.006</b>      |
| Item No. 6  | Disagree | 284 (67.6%)             | 84 (63.2%)            | 0.342        | 175 (61.4%)                  | 193 (72%)                 | <b>0.008</b>      |
| Item No. 7  | Agree    | 47 (11.2%)              | 23 (17.3%)            | 0.065        | 34 (11.9%)                   | 36 (13.4%)                | 0.595             |
| Item No. 8  | Disagree | 308 (73.3%)             | 95 (71.4%)            | 0.667        | 185 (64.9%)                  | 218 (81.3%)               | <b>&lt; 0.001</b> |
| Item No. 9  | Agree    | 232 (55.2%)             | 68 (51.1%)            | 0.407        | 150 (52.6%)                  | 150 (56%)                 | 0.431             |
| Item No. 10 | Disagree | 327 (77.9%)             | 90 (67.7%)            | <b>0.017</b> | 191 (67%)                    | 226 (84.3%)               | <b>&lt; 0.001</b> |
| Item No. 11 | Agree    | 92 (21.9%)              | 41 (30.8%)            | <b>0.036</b> | 34 (11.9%)                   | 99 (36.9%)                | <b>&lt; 0.001</b> |
| Item No. 12 | Agree    | 404 (96.2%)             | 122 (91.7%)           | <b>0.037</b> | 273 (95.8%)                  | 253 (94.4%)               | 0.450             |

|             |          |             |             |                   |             |             |                   |
|-------------|----------|-------------|-------------|-------------------|-------------|-------------|-------------------|
| Item No. 13 | Agree    | 388 (92.4%) | 124 (93.2%) | 0.744             | 270 (94.7%) | 242 (90.3%) | <b>0.046</b>      |
| Item No. 14 | Disagree | 152 (36.2%) | 46 (34.6%)  | 0.737             | 76 (26.7%)  | 122 (45.5%) | <b>&lt; 0.001</b> |
| Item No. 15 | Disagree | 171 (40.7%) | 53 (39.8%)  | 0.859             | 100 (35.1%) | 124 (46.3%) | <b>0.007</b>      |
| Item No. 16 | Agree    | 18 (4.3%)   | 2 (1.5%)    | 0.134             | 12 (4.2%)   | 8 (3%)      | 0.440             |
| Item No. 17 | Agree    | 62 (14.8%)  | 43 (32.3%)  | <b>&lt; 0.001</b> | 69 (24.2%)  | 36 (13.4%)  | <b>0.001</b>      |
| Item No. 18 | Agree    | 109 (26%)   | 48 (36.1%)  | <b>0.024</b>      | 101 (35.4%) | 56 (20.9%)  | <b>&lt; 0.001</b> |
| Item No. 19 | Agree    | 166 (39.5%) | 44 (33.1%)  | 0.182             | 108 (37.9%) | 102 (38.1%) | 0.968             |
| Item No. 20 | Agree    | 223 (53.1%) | 67 (50.4%)  | 0.584             | 132 (46.3%) | 158 (59%)   | <b>0.003</b>      |

Chi-squared ( $\chi^2$ ) test was used with a significance level (*Sig.*)  $\leq 0.05$ . The significant values are in **bold** font.

**Table S5.** Pairwise Comprison of Consecutive Academic Levels, Lebanon, 2019/2020, ( $n = 316$ )

| Pair                                               | Knowledge     |              | Attitudes     |             | Behaviours    |              |
|----------------------------------------------------|---------------|--------------|---------------|-------------|---------------|--------------|
|                                                    | Mean Rank     | <i>Sig.</i>  | Mean Rank     | <i>Sig.</i> | Mean Rank     | <i>Sig.</i>  |
| <b>1<sup>st</sup> Year vs. 2<sup>nd</sup> Year</b> | 77.80 / 80.89 | 0.661        | 82.55 / 77.01 | 0.412       | 72.20 / 85.45 | <b>0.042</b> |
| <b>2<sup>nd</sup> Year vs. 3<sup>rd</sup> Year</b> | 61.17 / 83.71 | <b>0.001</b> | 66.48 / 74.65 | 0.212       | 70.02 / 68.61 | 0.817        |
| <b>3<sup>rd</sup> Year vs. 4<sup>th</sup> Year</b> | 44.19 / 44.93 | 0.887        | 42.65 / 47.05 | 0.398       | 42.83 / 46.80 | 0.422        |
| <b>4<sup>th</sup> Year vs. 5<sup>th</sup> Year</b> | 54.04 / 53.98 | 0.992        | 58.45 / 54.65 | 0.249       | 49.85 / 56.19 | 0.269        |

Mann-Whitney (*U*) test was used with a significance level (*Sig.*)  $\leq 0.05$ . The significant values are in **bold** font.

**Table S6.** Pairwise Comprison of Consecutive Academic Levels, Syria, 2019/2020, ( $n = 561$ )

| Pair                                               | Knowledge       |              | Attitudes       |              | Behaviours      |             |
|----------------------------------------------------|-----------------|--------------|-----------------|--------------|-----------------|-------------|
|                                                    | Mean Rank       | <i>Sig.</i>  | Mean Rank       | <i>Sig.</i>  | Mean Rank       | <i>Sig.</i> |
| <b>1<sup>st</sup> Year vs. 2<sup>nd</sup> Year</b> | 108.79 / 108.22 | 0.946        | 107.75 / 109.23 | 0.853        | 105.40 / 111.54 | 0.429       |
| <b>2<sup>nd</sup> Year vs. 3<sup>rd</sup> Year</b> | 117.24 / 110.01 | 0.392        | 123.19 / 104.47 | <b>0.022</b> | 106.80 / 119.74 | 0.102       |
| <b>3<sup>rd</sup> Year vs. 4<sup>th</sup> Year</b> | 109.97 / 136.63 | <b>0.003</b> | 118.10 / 129.31 | 0.187        | 124.42 / 123.62 | 0.922       |
| <b>4<sup>th</sup> Year vs. 5<sup>th</sup> Year</b> | 112.08 / 117.71 | 0.509        | 113.56 / 115.74 | 0.790        | 115.96 / 112.56 | 0.671       |

Mann-Whitney (*U*) test was used with a significance level (*Sig.*)  $\leq 0.05$ . The significant values are in **bold** font.

**Table S7.** Pairwise Comprison of Consecutive Academic Levels, Tunisia, 2019/2020, ( $n = 553$ )

| Pair                                               | Knowledge      |              | Attitudes       |              | Behaviours      |             |
|----------------------------------------------------|----------------|--------------|-----------------|--------------|-----------------|-------------|
|                                                    | Mean Rank      | <i>Sig.</i>  | Mean Rank       | <i>Sig.</i>  | Mean Rank       | <i>Sig.</i> |
| <b>1<sup>st</sup> Year vs. 2<sup>nd</sup> Year</b> | 95.81 / 118.35 | <b>0.006</b> | 106.95 / 108.01 | 0.891        | 109.37 / 105.76 | 0.643       |
| <b>2<sup>nd</sup> Year vs. 3<sup>rd</sup> Year</b> | 91.82 / 90.99  | 0.915        | 90.76 / 92.66   | 0.791        | 88.60 / 96.04   | 0.308       |
| <b>3<sup>rd</sup> Year vs. 4<sup>th</sup> Year</b> | 74.89 / 89.12  | <b>0.050</b> | 70.51 / 92.43   | <b>0.002</b> | 83.64 / 82.52   | 0.869       |
| <b>4<sup>th</sup> Year vs. 5<sup>th</sup> Year</b> | 89.88 / 86.92  | 0.690        | 84.12 / 93.52   | 0.193        | 87.85 / 89.25   | 0.842       |
| <b>5<sup>th</sup> Year vs. 6<sup>th</sup> Year</b> | 82.91 / 91.59  | 0.235        | 85.57 / 89.22   | 0.613        | 85.71 / 89.10   | 0.623       |

Mann-Whitney (*U*) test was used with a significance level (*Sig.*)  $\leq 0.05$ . The significant values are in **bold** font.

**Table S8.** Knowledge, Attitudes, Behaviours and Total HU-DBI Score of the Lebanese Dental Students, 2019/2020, ( $n = 316$ )

| Variable             | Outcome              | Knowledge       |                   | Attitudes       |             | Behaviours      |              | HU-DBI          |                   |
|----------------------|----------------------|-----------------|-------------------|-----------------|-------------|-----------------|--------------|-----------------|-------------------|
|                      |                      | (0 – 5)         | <i>Sig.</i>       | (0 – 3)         | <i>Sig.</i> | (0 – 4)         | <i>Sig.</i>  | (0 – 12)        | <i>Sig.</i>       |
| <b>Sex</b>           | Female               | 3.31 $\pm$ 1.19 | 0.668             | 1.15 $\pm$ 0.80 | 0.088       | 2.10 $\pm$ 0.74 | 0.677        | 6.57 $\pm$ 1.92 | 0.212             |
|                      | Male                 | 3.39 $\pm$ 1.09 |                   | 1.33 $\pm$ 0.80 |             | 2.16 $\pm$ 0.71 |              | 6.88 $\pm$ 1.61 |                   |
| <b>Academic Year</b> | 1 <sup>st</sup> Year | 2.92 $\pm$ 1.26 | <b>&lt; 0.001</b> | 1.15 $\pm$ 0.71 | 0.258       | 1.87 $\pm$ 0.83 | <b>0.001</b> | 5.94 $\pm$ 1.92 | <b>&lt; 0.001</b> |
|                      | 2 <sup>nd</sup> Year | 3.05 $\pm$ 1.09 |                   | 1.08 $\pm$ 0.78 |             | 2.10 $\pm$ 0.67 |              | 6.23 $\pm$ 1.46 |                   |
|                      | 3 <sup>rd</sup> Year | 3.67 $\pm$ 1.05 |                   | 1.29 $\pm$ 0.90 |             | 2.08 $\pm$ 0.63 |              | 7.04 $\pm$ 1.72 |                   |
|                      | 4 <sup>th</sup> Year | 3.73 $\pm$ 0.99 |                   | 1.43 $\pm$ 0.90 |             | 2.24 $\pm$ 0.83 |              | 7.41 $\pm$ 1.79 |                   |

|                           |                      |             |                   |             |       |             |                   |             |                   |
|---------------------------|----------------------|-------------|-------------------|-------------|-------|-------------|-------------------|-------------|-------------------|
|                           | 5 <sup>th</sup> Year | 3.69 ± 1.06 |                   | 1.24 ± 0.79 |       | 2.37 ± 0.64 |                   | 7.30 ± 1.85 |                   |
| <b>Clinical Training</b>  | Preclinical          | 3.15 ± 1.18 | <b>&lt; 0.001</b> | 1.16 ± 0.79 | 0.130 | 2.02 ± 0.72 | <b>&lt; 0.001</b> | 6.33 ± 1.74 | <b>&lt; 0.001</b> |
|                           | Clinical             | 3.70 ± 1.03 |                   | 1.31 ± 0.83 |       | 2.33 ± 0.71 |                   | 7.34 ± 1.82 |                   |
| <b>Tobacco Smoking</b>    | Yes                  | 3.35 ± 1.10 | 0.951             | 1.19 ± 0.77 | 0.726 | 2.12 ± 0.74 | 0.870             | 6.65 ± 1.70 | 0.647             |
|                           | No                   | 3.34 ± 1.17 |                   | 1.21 ± 0.82 |       | 2.13 ± 0.73 |                   | 6.68 ± 1.86 |                   |
| <b>Internet Addiction</b> | Yes                  | 3.32 ± 1.18 | 0.472             | 1.21 ± 0.79 | 0.711 | 2.12 ± 0.74 | 0.529             | 6.65 ± 1.81 | 0.424             |
|                           | No                   | 3.47 ± 0.97 |                   | 1.19 ± 0.92 |       | 2.17 ± 0.70 |                   | 6.83 ± 1.94 |                   |

Mann-Whitney (*U*) and Kruskal-Wallis (*H*) tests were used with a significance level (*Sig.*) ≤ 0.05. The significant values are in **bold** font.

**Table S9.** Knowledge, Attitudes, Behaviours and Total HU-DBI Score of the Syrian Dental Students, 2019/2020, (*n* = 561)

| Variable                  | Outcome              | Knowledge (0 – 5) | Sig.              | Attitudes (0 – 3) | Sig.  | Behaviours (0 – 4) | Sig.         | HU-DBI (0 – 12) | Sig.         |
|---------------------------|----------------------|-------------------|-------------------|-------------------|-------|--------------------|--------------|-----------------|--------------|
| <b>Sex</b>                | Female               | 3.04 ± 1.31       | 0.769             | 1.20 ± 0.82       | 0.834 | 2.03 ± 0.72        | <b>0.035</b> | 6.27 ± 1.95     | 0.418        |
|                           | Male                 | 3.10 ± 1.21       |                   | 1.19 ± 0.89       |       | 2.16 ± 0.80        |              | 6.45 ± 1.73     |              |
| <b>Academic Year</b>      | 1 <sup>st</sup> Year | 2.93 ± 1.40       | <b>0.002</b>      | 1.28 ± 0.88       | 0.131 | 1.95 ± 0.83        | 0.064        | 6.17 ± 1.91     | <b>0.019</b> |
|                           | 2 <sup>nd</sup> Year | 2.94 ± 1.23       |                   | 1.32 ± 0.93       |       | 2.04 ± 0.76        |              | 6.29 ± 1.95     |              |
|                           | 3 <sup>rd</sup> Year | 2.83 ± 1.20       |                   | 1.03 ± 0.86       |       | 2.19 ± 0.78        |              | 6.05 ± 1.80     |              |
|                           | 4 <sup>th</sup> Year | 3.28 ± 1.21       |                   | 1.15 ± 0.79       |       | 2.21 ± 0.70        |              | 6.64 ± 1.69     |              |
|                           | 5 <sup>th</sup> Year | 3.41 ± 1.13       |                   | 1.19 ± 0.85       |       | 2.13 ± 0.77        |              | 6.73 ± 1.73     |              |
| <b>Clinical Training</b>  | Preclinical          | 2.90 ± 1.28       | <b>&lt; 0.001</b> | 1.21 ± 0.90       | 0.807 | 2.06 ± 0.79        | 0.102        | 6.17 ± 1.88     | <b>0.001</b> |
|                           | Clinical             | 3.33 ± 1.18       |                   | 1.17 ± 0.81       |       | 2.18 ± 0.73        |              | 6.68 ± 1.71     |              |
| <b>Tobacco Smoking</b>    | Yes                  | 3.00 ± 1.22       | 0.241             | 1.12 ± 0.88       | 0.123 | 2.18 ± 0.80        | 0.313        | 6.29 ± 1.75     | 0.267        |
|                           | No                   | 3.11 ± 1.27       |                   | 1.23 ± 0.85       |       | 2.08 ± 0.75        |              | 6.41 ± 1.86     |              |
| <b>Alcohol Drinking</b>   | Yes                  | 2.93 ± 1.37       | 0.503             | 1.00 ± 0.86       | 0.130 | 2.07 ± 0.80        | 0.645        | 6.00 ± 1.77     | 0.199        |
|                           | No                   | 3.09 ± 1.25       |                   | 1.21 ± 0.85       |       | 2.11 ± 0.77        |              | 6.41 ± 1.83     |              |
| <b>Internet Addiction</b> | Yes                  | 3.00 ± 1.25       | <b>0.007</b>      | 1.18 ± 0.86       | 0.465 | 2.09 ± 0.79        | 0.432        | 6.28 ± 1.85     | <b>0.014</b> |
|                           | No                   | 3.34 ± 1.25       |                   | 1.23 ± 0.87       |       | 2.18 ± 0.69        |              | 6.76 ± 1.67     |              |

Mann-Whitney (*U*) and Kruskal-Wallis (*H*) tests were used with a significance level (*Sig.*) ≤ 0.05. The significant values are in **bold** font.

**Table S10.** Knowledge, Attitudes, Behaviours and Total HU-DBI Score of the Tunisian Dental Students, 2019/2020, (*n* = 553)

| Variable                 | Outcome              | Knowledge (0 – 5) | Sig.              | Attitudes (0 – 3) | Sig.              | Behaviours (0 – 4) | Sig.  | HU-DBI (0 – 12) | Sig.              |
|--------------------------|----------------------|-------------------|-------------------|-------------------|-------------------|--------------------|-------|-----------------|-------------------|
| <b>Sex</b>               | Female               | 2.93 ± 1.24       | 0.233             | 1.26 ± 0.86       | 0.756             | 1.90 ± 0.73        | 0.844 | 5.92 ± 1.77     | 0.432             |
|                          | Male                 | 2.75 ± 1.19       |                   | 1.29 ± 0.83       |                   | 1.89 ± 0.73        |       | 6.09 ± 1.84     |                   |
| <b>Academic Year</b>     | 1 <sup>st</sup> Year | 2.33 ± 1.33       | <b>&lt; 0.001</b> | 0.99 ± 0.79       | <b>&lt; 0.001</b> | 1.86 ± 0.78        | 0.680 | 5.18 ± 1.89     | <b>&lt; 0.001</b> |
|                          | 2 <sup>nd</sup> Year | 2.79 ± 1.19       |                   | 0.99 ± 0.68       |                   | 1.82 ± 0.73        |       | 5.60 ± 1.78     |                   |
|                          | 3 <sup>rd</sup> Year | 2.77 ± 1.26       |                   | 1.03 ± 0.77       |                   | 1.92 ± 0.67        |       | 5.72 ± 1.84     |                   |
|                          | 4 <sup>th</sup> Year | 3.16 ± 1.08       |                   | 1.41 ± 0.75       |                   | 1.90 ± 0.73        |       | 6.48 ± 1.70     |                   |
|                          | 5 <sup>th</sup> Year | 3.06 ± 1.15       |                   | 1.57 ± 0.92       |                   | 1.91 ± 0.72        |       | 6.55 ± 1.57     |                   |
|                          | 6 <sup>th</sup> Year | 3.29 ± 0.94       |                   | 1.65 ± 0.83       |                   | 1.97 ± 0.72        |       | 6.91 ± 1.53     |                   |
| <b>Clinical Training</b> | Preclinical          | 2.62 ± 1.27       | <b>&lt; 0.001</b> | 1.00 ± 0.74       | <b>&lt; 0.001</b> | 1.86 ± 0.73        | 0.203 | 5.48 ± 1.84     | <b>&lt; 0.001</b> |
|                          | Clinical             | 3.18 ± 1.06       |                   | 1.54 ± 0.84       |                   | 1.93 ± 0.72        |       | 6.65 ± 1.61     |                   |
| <b>Tobacco Smoking</b>   | Yes                  | 2.62 ± 1.30       | <b>0.013</b>      | 1.09 ± 0.77       | <b>0.018</b>      | 1.85 ± 0.75        | 0.403 | 5.56 ± 1.81     | <b>0.001</b>      |
|                          | No                   | 2.95 ± 1.18       |                   | 1.30 ± 0.84       |                   | 1.90 ± 0.72        |       | 6.16 ± 1.82     |                   |
| <b>Alcohol Drinking</b>  | Yes                  | 2.54 ± 1.41       | 0.082             | 1.24 ± 0.72       | 0.969             | 1.89 ± 0.74        | 0.945 | 5.68 ± 1.90     | 0.270             |
|                          | No                   | 2.91 ± 1.19       |                   | 1.27 ± 0.84       |                   | 1.89 ± 0.73        |       | 6.07 ± 1.82     |                   |

|                               |     |             |       |             |       |             |       |             |       |
|-------------------------------|-----|-------------|-------|-------------|-------|-------------|-------|-------------|-------|
| <b>Internet<br/>Addiction</b> | Yes | 2.87 ± 1.22 | 0.142 | 1.27 ± 0.83 | 0.470 | 1.90 ± 0.73 | 0.363 | 6.04 ± 1.83 | 0.967 |
|                               | No  | 3.18 ± 1.00 |       | 1.18 ± 0.90 |       | 1.79 ± 0.64 |       | 6.15 ± 1.73 |       |

Mann-Whitney (*U*) and Kruskal-Wallis (*H*) tests were used with a significance level (*Sig.*) ≤ 0.05. The significant values are in **bold font**.

**Table S11.** HU-DBI Score of Dental Students in the Arab League Member States, 2006 – 2020, (*n* = 6941)

| Study                                 | Item 2          | Item 4       | Item 6          | Item 8          | Item 9       | Item 10         | Item 11      | Item 12      | Item 14         | Item 15         | Item 16      | Item 19      | Total       |
|---------------------------------------|-----------------|--------------|-----------------|-----------------|--------------|-----------------|--------------|--------------|-----------------|-----------------|--------------|--------------|-------------|
| Author, Year                          | <i>Disagree</i> | <i>Agree</i> | <i>Disagree</i> | <i>Disagree</i> | <i>Agree</i> | <i>Disagree</i> | <i>Agree</i> | <i>Agree</i> | <i>Disagree</i> | <i>Disagree</i> | <i>Agree</i> | <i>Agree</i> | Score       |
| Al-wesabi <i>et al.</i> , 2015 [58]   | 70.2%           | 37.4%        | 85.7%           | 77.5%           | 65.6%        | 64.8%           | 21.2%        | 82.3%        | 39.9%           | 43.9%           | 6.0%         | 39.9%        | 6.77 ± 1.73 |
| Abu Alregal <i>et al.</i> , 2016 [63] | 75.9%           | 31.5%        | 84.8%           | 79.8%           | 69.2%        | 65.7%           | 22.3%        | 80.0%        | 39.2%           | 41.7%           | 6.2%         | 36.8%        | 6.33 ± 1.66 |
| Al-wahadni <i>et al.</i> , 2004 [64]  | 87.9%           | 23%          | 46.6%           | 70.1%           | 70.1%        | 87.9%           | 7%           | 77.1%        | 51.4%           | 57%             | 18%          | 42%          | 6.38 ± 1.72 |
| Al-omiri <i>et al.</i> , 2010 [65]    | 73.8%           | 26.9%        | 56.4%           | 72.2%           | 78.1%        | 66.7%           | 11.4%        | 89.0%        | 47.4%           | 39.8%           | 15.5%        | 40.2%        | 5.2 ± 1.57  |
| Ali D., 2015 [66]                     | 79%             | 24%          | 59%             | 82%             | 78%          | 62%             | 11%          | 12%          | 40%             | 47%             | 19%          | 20%          | 5.74 ± 0.23 |
| Riad <i>et al.</i> 2020 [Lebanon]     | 79.4%           | 28.2%        | 65.2%           | 78.2%           | 76.6%        | 74.7%           | 16.8%        | 91.1%        | 38.9%           | 63%             | 16.5%        | 38.6%        | 6.67 ± 1.83 |
| Kateeb E., 2006 [57]                  | 68.1%           | 37.7%        | 45.4%           | 60.8%           | 72.3%        | 73.1%           | 16.9%        | 83.5%        | 40%             | 49.6%           | 16.9%        | 48.5%        | 6.13 ± 1.31 |
| Baseer <i>et al.</i> , 2011 [68]      | 63.2%           | 24.2%        | 66.1%           | 68.9%           | 69.8%        | 54.4%           | 29.6%        | 78.6%        | 46.7%           | 49.9%           | 44.7%        | 58.1%        | 6.54 ± 1.07 |
| Kumar <i>et al.</i> , 2011 [69]       | 61.5%           | 34.5%        | 65.2%           | 63.9%           | 73.1%        | 61.5%           | 42.3%        | 88.4%        | 34.6%           | 57.6%           | 57.5%        | 61.5%        | 6.65 ± 1.08 |
| Moheet <i>et al.</i> , 2013 [70]      | 75%             | 36.6%        | 64.2%           | 72.3%           | 79.5%        | 64.2%           | 13.4%        | 67.9%        | 43.75%          | 55.4%           | 26.8%        | 45.5%        | 6.45 ± 1.33 |
| Khalid <i>et al.</i> , 2011 [71]      | 82.1%           | 40.3%        | 64.1%           | 63.0%           | 88.5%        | 56.5%           | 9.1%         | 70.9%        | 39.1%           | 34.5%           | 7.2%         | 69.0%        | 6.24 ± 1.64 |
| Riad <i>et al.</i> , 2020 [Syria]     | 67%             | 36.2%        | 62%             | 72.9%           | 74.9%        | 59.5%           | 18.9%        | 88.2%        | 38.3%           | 53.3%           | 11.6%        | 54.7%        | 6.38 ± 1.83 |
| Riad <i>et al.</i> , 2020 [Tunisia]   | 62.2%           | 36.3%        | 66.5%           | 72.9%           | 54.2%        | 75.4%           | 24.1%        | 95.1%        | 35.8%           | 40.5%           | 3.6%         | 38%          | 6.05 ± 1.83 |
| Kawas <i>et al.</i> , 2009 [72]       | 75%             | 24%          | 73%             | 73%             | 55%          | 88%             | 9%           | 77%          | 47%             | 80%             | 17%          | 59%          | 9.45 ± 1.48 |
| Hashim <i>et al.</i> , 2012 [73]      | 79.6%           | 26.9%        | 61.6%           | 80.6%           | 79.6%        | 72.8%           | 12.5%        | 84.2%        | 49.8%           | 47.3%           | 21.1%        | 43.4%        | 6.59 ± 1.89 |
| Rahman <i>et al.</i> , 2013 [74]      | 71.4%           | 10.4%        | 91.6%           | 75.5%           | 47.6%        | 99.1%           | 1.7%         | 69.1%        | 62.4%           | 80.2%           | 91.1%        | 31.5%        | 7.32 ± 1.53 |
| Halboub <i>et al.</i> 2015 [19]       | 46.9%           | 76.9%        | 82.9%           | 29.0%           | 69.6%        | 94.1%           | 17.7%        | 76.1%        | 22.3%           | 68.9%           | 0%           | 26.1%        | 5.06 ± 1.63 |
